# Supplementary material
Source: Springer Nature journal article supplement (https://www.springermedizin.de/resource/supplementary/12888_2010_691_MOESM2_ESM.pdf/9478172)
Supplement: MOESM2 [file 9478172]

**Suitable patients identified (n=3293)**  
- Computer Database Search (n=2,974)  
- GP recommendation (n=188)  
- Poster/ self-referral (n=34)  
- No information (n=97)

**Invited to participate (n= 3293)**

**Declined to participate (n=2,334)**  
- not depressed (144)  
- no time/moving away (80)  
- not interested (62)  
- doesn't want to talk (39)  
- happy with treatment (21)  
- too unwell (13)  
- copes alone (11)  
- other (29)  
- No information (1935)

**Scheduled for recruitment interview (n= 959)**

**Cancelled/ DNA recruitment interview (n=131)**

**Attended recruitment interview (n=828)**

**Excluded (n= 270)**  
Ineligible (n=240)  
- Scored < 14 on BDI = 157  
- Ineligible on CIDI interview = 83  
Refused to participate (n= 30)

**Included and randomised (n=558)**

**Allocated to control group (n=276)**

**Allocated to pro-active care intervention (n=282)**
